# Supplementary material for: An Experimental Study to Assess the Professional and Social Consequences of Tardive Dyskinesia
Source: PubMed Central journal article supplement — Clin Psychopharmacol Neurosci. 2022 Feb 28;20(1):154–66. doi: 10.9758/cpn.2022.20.1.154 (PMC8813323; doi:10.9758/cpn.2022.20.1.154), 2022-02-28
Supplement: cpn-20-1-154-supple.pdf [file cpn-20-1-154-supple.pdf]

## SUPPLEMENTARY MATERIALS

**Supplementary Table 1.** Summary of results from physician evaluation of the videos showing individuals with TD<sup>a</sup>

| Results        | Mild-to-moderate TD |               |               | Moderate-to-severe TD |               |               |
|----------------|---------------------|---------------|---------------|-----------------------|---------------|---------------|
|                | Employment          | Dating        | Friendship    | Employment            | Dating        | Friendship    |
| Mean $\pm$ SD  | 2.5 $\pm$ 0.7       | 2.5 $\pm$ 0.7 | 2.6 $\pm$ 0.7 | 2.9 $\pm$ 0.9         | 3.1 $\pm$ 0.7 | 3.1 $\pm$ 0.8 |
| Median (range) | 3.0 (1.0–3.5)       | 2.8 (1.0–3.5) | 3.0 (1.0–3.5) | 3.0 (1.0–4.0)         | 3.0 (2.0–4.0) | 3.0 (1.0–4.0) |

TD, tardive dyskinesia; SD, standard deviation.

<sup>a</sup>Scoring for authenticity of TD symptoms was as follows: 0 = The actor's TD symptoms are very unrealistic; 1 = The actor's TD symptoms are moderately unrealistic; 2 = The actor's TD symptoms are realistic; 3 = The actor's TD symptoms are very realistic; 4 = The actor's TD symptoms are almost indistinguishable from those of a real-life person with TD.

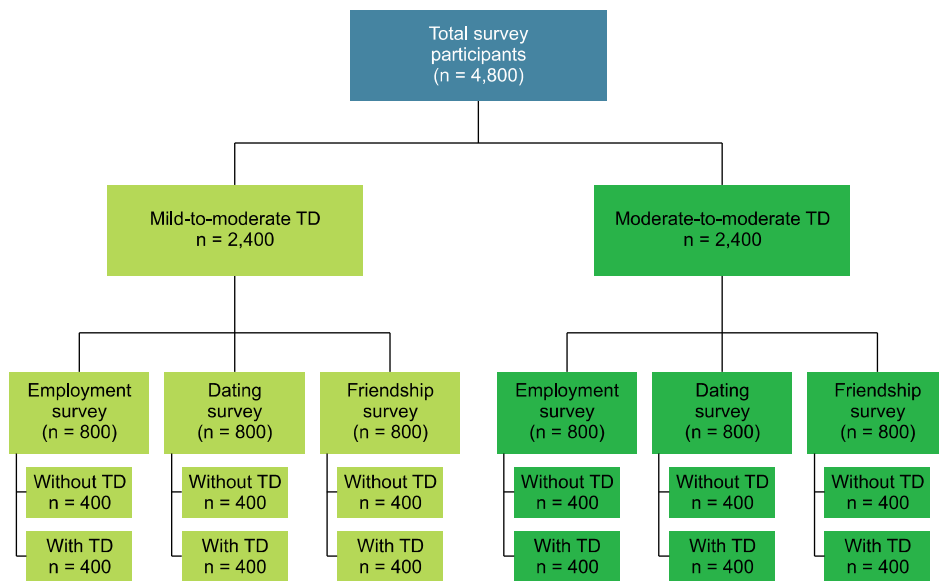

**Supplementary Fig. 1.** Participant flow chart. The groups of 400 participants who viewed videos with or without TD movements were divided according to the 4 actors, such that each specific video was viewed by 100 participants as described in the text. TD, tardive dyskinesia.

**Supplementary Table 2.** Survey participant characteristics

| Characteristic                                                                   | Mild-to-moderate TD                  |                                   |                | Moderate-to-severe TD                |                                   |                |
|----------------------------------------------------------------------------------|--------------------------------------|-----------------------------------|----------------|--------------------------------------|-----------------------------------|----------------|
|                                                                                  | Actors without TD symptoms (n = 400) | Actors with TD symptoms (n = 400) | <i>p</i> value | Actors without TD symptoms (n = 400) | Actors with TD symptoms (n = 400) | <i>p</i> value |
| <b>Employment survey</b>                                                         |                                      |                                   |                |                                      |                                   |                |
| Age (yr)                                                                         | 49.0 ± 16.8                          | 48.6 ± 17.8                       | 0.52           | 46.9 ± 16.2                          | 46.0 ± 16.1                       | 0.41           |
| Men                                                                              | 131 (32.8)                           | 138 (34.5)                        | 0.65           | 202 (50.5)                           | 200 (50.0)                        | 0.60           |
| White/Caucasian                                                                  | 335 (83.8)                           | 341 (85.3)                        | 0.27           | 345 (86.3)                           | 343 (85.8)                        | 0.14           |
| Bachelor's degree or higher                                                      | 228 (57.0)                           | 235 (58.8)                        | 0.08           | 240 (60.0)                           | 251 (62.8)                        | 0.32           |
| Working full-time                                                                | 176 (44.0)                           | 160 (40.0)                        | 0.69           | 242 (60.5)                           | 263 (65.8)                        | 0.18           |
| > 10 years work experience                                                       | 309 (77.3)                           | 283 (70.8)                        | 0.23           | 296 (74.0)                           | 282 (70.5)                        | 0.55           |
| Experience with hiring for client-facing positions                               | 273 (68.3)                           | 244 (61.0)                        | < 0.05         | 264 (66.0)                           | 259 (64.8)                        | 0.77           |
| Experience with hiring for back-office jobs                                      | 146 (36.5)                           | 154 (38.5)                        | 0.61           | 166 (41.5)                           | 166 (41.5)                        | 1.00           |
| <b>Dating survey</b>                                                             |                                      |                                   |                |                                      |                                   |                |
| Age (yr)                                                                         | 46.4 ± 18.5                          | 45.9 ± 18.1                       | 0.80           | 45.4 ± 16.8                          | 45.6 ± 17.2                       | 0.96           |
| Men                                                                              | 169 (42.3)                           | 159 (39.8)                        | 0.85           | 180 (45.0)                           | 186 (46.5)                        | 0.35           |
| White/Caucasian                                                                  | 320 (80.0)                           | 320 (80.0)                        | 0.80           | 312 (78.0)                           | 320 (80.0)                        | 0.37           |
| Bachelor's degree or higher                                                      | 164 (41.0)                           | 162 (40.5)                        | 0.16           | 182 (45.5)                           | 175 (43.8)                        | 0.54           |
| ≥ 1 relationship in the past                                                     | 355 (88.8)                           | 353 (88.3)                        | 0.87           | 360 (90.0)                           | 368 (92.0)                        | 0.17           |
| Met the last dating partner through online dating/social media or common friends | 190 (47.5)                           | 187 (46.8)                        | 0.61           | 203 (50.8)                           | 210 (52.5)                        | 0.95           |
| <b>Friendship survey</b>                                                         |                                      |                                   |                |                                      |                                   |                |
| Age (yr)                                                                         | 47.9 ± 18.1                          | 47.8 ± 18.2                       | 0.99           | 46.7 ± 17.9                          | 47.4 ± 18.1                       | 0.68           |
| Men                                                                              | 151 (37.8)                           | 156 (39.0)                        | 0.76           | 174 (43.5)                           | 188 (47.0)                        | 0.15           |
| White/Caucasian                                                                  | 322 (80.5)                           | 313 (78.3)                        | 0.08           | 331 (82.8)                           | 331 (82.8)                        | 0.84           |
| Bachelor's degree or higher                                                      | 142 (35.5)                           | 147 (36.8)                        | 0.56           | 175 (43.8)                           | 184 (46.0)                        | 0.78           |
| Considered a social person by friends/family                                     | 204 (51.0)                           | 190 (47.5)                        | 0.40           | 226 (56.5)                           | 237 (59.3)                        | 0.66           |
| Attended ≥ 1 social event per month                                              | 256 (64.0)                           | 259 (64.8)                        | 0.92           | 267 (66.8)                           | 270 (67.5)                        | 0.66           |

Values are presented as mean ± standard deviation or number (%).

TD, tardive dyskinesia.

Participant characteristics in the groups that watched the videos showing individuals with (test group) or without (control group) TD movements. Age, gender, race, education, and relevant experience to the survey domain were recorded.
